# Supplementary material
Source: PubMed Central journal article supplement (PMC283501)
Supplement: pnas_100_24_13797__3.pdf [file pnas_100_24_13797__3.pdf]

**A**

| Rotation angle,<br>$N \times 360^\circ/7$ | Cyclic permutations of six subunits in the <b>t</b> state and one subunit in the <b>r</b> state |          |          |          |          |          | $N_{\text{same}}$ |   |
|-------------------------------------------|-------------------------------------------------------------------------------------------------|----------|----------|----------|----------|----------|-------------------|---|
| 0                                         | <b>r</b>                                                                                        | <b>t</b> | <b>t</b> | <b>t</b> | <b>t</b> | <b>t</b> | <b>t</b>          | 7 |
| 1                                         | <b>t</b>                                                                                        | <b>r</b> | <b>t</b> | <b>t</b> | <b>t</b> | <b>t</b> | <b>t</b>          | 5 |
| 2                                         | <b>t</b>                                                                                        | <b>t</b> | <b>r</b> | <b>t</b> | <b>t</b> | <b>t</b> | <b>t</b>          | 5 |
| 3                                         | <b>t</b>                                                                                        | <b>t</b> | <b>t</b> | <b>r</b> | <b>t</b> | <b>t</b> | <b>t</b>          | 5 |
| 4                                         | <b>t</b>                                                                                        | <b>t</b> | <b>t</b> | <b>t</b> | <b>r</b> | <b>t</b> | <b>t</b>          | 5 |
| 5                                         | <b>t</b>                                                                                        | <b>t</b> | <b>t</b> | <b>t</b> | <b>t</b> | <b>r</b> | <b>t</b>          | 5 |
| 6                                         | <b>t</b>                                                                                        | <b>t</b> | <b>t</b> | <b>t</b> | <b>t</b> | <b>t</b> | <b>r</b>          | 5 |
| 7                                         | <b>r</b>                                                                                        | <b>t</b> | <b>t</b> | <b>t</b> | <b>t</b> | <b>t</b> | <b>t</b>          | 7 |

**B**

| Rotation angle,<br>$N \times 360^\circ/7$ | Cyclic permutations of five subunits in the <b>t</b> state and two subunits in the <b>r</b> state |          |          |          |          |          | $N_{\text{same}}$ |   |
|-------------------------------------------|---------------------------------------------------------------------------------------------------|----------|----------|----------|----------|----------|-------------------|---|
| 0                                         | <b>r</b>                                                                                          | <b>r</b> | <b>t</b> | <b>t</b> | <b>t</b> | <b>t</b> | <b>t</b>          | 7 |
| 1                                         | <b>t</b>                                                                                          | <b>r</b> | <b>r</b> | <b>t</b> | <b>t</b> | <b>t</b> | <b>t</b>          | 5 |
| 2                                         | <b>t</b>                                                                                          | <b>t</b> | <b>r</b> | <b>r</b> | <b>t</b> | <b>t</b> | <b>t</b>          | 3 |
| 3                                         | <b>t</b>                                                                                          | <b>t</b> | <b>t</b> | <b>r</b> | <b>r</b> | <b>t</b> | <b>t</b>          | 3 |
| 4                                         | <b>t</b>                                                                                          | <b>t</b> | <b>t</b> | <b>t</b> | <b>r</b> | <b>r</b> | <b>t</b>          | 3 |
| 5                                         | <b>t</b>                                                                                          | <b>t</b> | <b>t</b> | <b>t</b> | <b>t</b> | <b>r</b> | <b>r</b>          | 3 |
| 6                                         | <b>r</b>                                                                                          | <b>t</b> | <b>t</b> | <b>t</b> | <b>t</b> | <b>t</b> | <b>r</b>          | 5 |
| 7                                         | <b>r</b>                                                                                          | <b>r</b> | <b>t</b> | <b>t</b> | <b>t</b> | <b>t</b> | <b>t</b>          | 7 |

**C**

| Rotation angle,<br>$N \times 360^\circ/7$ | Cyclic permutations of four subunits in the <b>t</b> state and three subunits in the <b>r</b> state |          |          |          |          |          | $N_{\text{same}}$ |   |
|-------------------------------------------|-----------------------------------------------------------------------------------------------------|----------|----------|----------|----------|----------|-------------------|---|
| 0                                         | <b>r</b>                                                                                            | <b>r</b> | <b>r</b> | <b>t</b> | <b>t</b> | <b>t</b> | <b>t</b>          | 7 |
| 1                                         | <b>t</b>                                                                                            | <b>r</b> | <b>r</b> | <b>r</b> | <b>t</b> | <b>t</b> | <b>t</b>          | 5 |
| 2                                         | <b>t</b>                                                                                            | <b>t</b> | <b>r</b> | <b>r</b> | <b>r</b> | <b>t</b> | <b>t</b>          | 3 |
| 3                                         | <b>t</b>                                                                                            | <b>t</b> | <b>t</b> | <b>r</b> | <b>r</b> | <b>r</b> | <b>t</b>          | 1 |
| 4                                         | <b>t</b>                                                                                            | <b>t</b> | <b>t</b> | <b>t</b> | <b>r</b> | <b>r</b> | <b>r</b>          | 1 |
| 5                                         | <b>r</b>                                                                                            | <b>t</b> | <b>t</b> | <b>t</b> | <b>t</b> | <b>r</b> | <b>r</b>          | 3 |
| 6                                         | <b>r</b>                                                                                            | <b>r</b> | <b>t</b> | <b>t</b> | <b>t</b> | <b>t</b> | <b>r</b>          | 5 |
| 7                                         | <b>r</b>                                                                                            | <b>r</b> | <b>r</b> | <b>t</b> | <b>t</b> | <b>t</b> | <b>t</b>          | 7 |
